# Supplementary material
Source: PubMed Central journal article supplement (PMC4542237)
Supplement: AEM.01478-15_zam999116562so1.pdf [file AEM.01478-15_zam999116562so1.pdf]

Improving the thermostability and activity of a thermophilic subtilase by incorporating structural elements of its psychrophilic counterpart

Bi-Lin Xu<sup>a</sup>, Meihong Dai<sup>a</sup>, Yuanhao Chen<sup>a</sup>, Dongheng Meng<sup>a</sup>, Yasi Wang<sup>a</sup>, Nan Fang<sup>a</sup>,  
Xiao-Feng Tang<sup>a,b</sup>, Bing Tang<sup>a,b</sup>#

State Key Laboratory of Virology, College of Life Sciences, Wuhan University,  
Wuhan 430072, China<sup>a</sup>; Hubei Provincial Cooperative Innovation Center of Industrial  
Fermentation, Wuhan 430072, China<sup>b</sup>.

Running Head: Further stabilization of thermophilic WF146 protease

#Address correspondence to Bing Tang: [tangb@whu.edu.cn](mailto:tangb@whu.edu.cn)

**Keywords:** serine protease; protein stability; enzyme structure; protein engineering;  
bacteria; thermophilic subtilase; psychrophilic subtilase; temperature adaptation

**TABLE S1 Oligonucleotide primers used in this study**

| Primer   | Oligonucleotide sequence*                      |
|----------|------------------------------------------------|
| PB-F     | 5'-AATTCGGATCCGATGGATGAGAGCAAGAGC-3'           |
| PX-R     | 5'-GTGCTCGAGTTGGTCGCCCGCTTGGACGGT-3'           |
| SA-F     | 5'-AGCGGCACGCCATGGCGACGCCG-3'                  |
| SA-R     | 5'-CGTCGCCATGGCCGTGCCGCTGAT-3'                 |
| A1-F     | 5'-CGCATCGAGGCATTGGCTGCTTCCGATCGAACGCCT-3'     |
| A1-R     | 5'-AGGCGTTCGATCGGAAGCAGCCAATGCCTCGATGCG-3'     |
| A2-F     | 5'-ACTCCTTCCAGGTC AACGCCTTGGGGG-3'             |
| A2-R     | 5'-CCAAGGCGTTGACTGGGAAGGAGTCGC-3'              |
| A3-F     | 5'-CCTTGGGGGATCA AAGCGATTTATCGG-3'             |
| A3-R     | 5'-CCGATAAATCGCTTGATCCCCCAAGG-3'               |
| A4-F     | 5'-GAAGCGATTTATAAT AATCCGTCGATC-3'             |
| A4-R     | 5'-GATCGACGGATTATTATAAATCGCTTC-3'              |
| A5-F     | 5'-ATTTATCGGAATTCGAACCTCACATCCACCAGCGGCGGC-3'  |
| A5-R     | 5'-GCCGCCGCTGGTGGATGTGAGGTTCCGATTCCGATAAAT-3'  |
| A7-F     | 5'-AGCGGCGGCCGGGGATTTCGCGTA-3'                 |
| A7-R     | 5'-GCGAATCCCCGCCGCCGCTGGT-3'                   |
| A8-F     | 5'-GGCGCAAGGGGATTAAACATTGCCGTCCTGGATACC-3'     |
| A8-R     | 5'-GGTATCCAGGACGGCAATGTTAATCCCCTGCCGCC-3'      |
| A9-F     | 5'-GATACCGGCGTCAATACCGCGCATCCT-3'              |
| A9-R     | 5'-ATGCGCGGTATGACGCCGGTATCCAG-3'               |
| A10-F    | 5'-GGCACCTATAACCAATCATCCTGATCTG-3'             |
| A10-R    | 5'-CAGATCAGGATGATTGGTATAGGTGCC-3'              |
| A11-F    | 5'-CCTGATCTGTCCAA CAATGTGGAGCAG-3'             |
| A11-R    | 5'-CTGCTCCACATTGTTGGACAGATCAGG-3'              |
| A12-F    | 5'-AATGTGGAGCAGTGC AAAGACTTCACCACGAGTTCG-3'    |
| A12-R    | 5'-CGAACTCGTGGTGAAGTCTTTGCACTGCTCCACATT-3'     |
| A13a-F   | 5'-GTGGGTACGA ACTTTGTGAACGGTTGCGCGGACGGCAAC-3' |
| A13a-R   | 5'-AAAGTTCGTACCCACGGTGAAGTTGTAGCACTGCTCCAC-3'  |
| A13b-F   | 5'-ACCGATAACA GTTGC GCGGACGGCAACGGACATGGG-3'   |
| A13b-R   | 5'-ACTGTTATCGGTGACAGGCGAACTCGTGGTGAAGTT-3'     |
| A14+15-F | 5'-ACGGACGCCAGGGACATGGGACCCAC-3'               |
| A14+15-R | 5'-CTGGCGGTCCGTGCAACCGTTCACGACAGG-3'           |
| A16-F    | 5'-GTAGCCGGCTCCGCCCTCGCCAACGGAGGAGGC-3'        |
| A16-R    | 5'-GTTGGCGAGGGCGGAGCCGGCTACGTGGGTCCC-3'        |
| A18-F    | 5'-AACGGAGGACCGGCAGCGGGATT-3'                  |
| A18-R    | 5'-CCCGCTGCCGTTTCTCCTCCGTTGGC-3'               |
| A19-F    | 5'-GGCAGCGGGGTTTACGGCGTCGCTCCG-3'              |
| A19-R    | 5'-AGCGACGCCGTAAA CCCGCTGCCGCC-3'              |
| A21-F    | 5'-CCGGAAGCCGATCTGTGGTTCGTAT-3'                |
| A21-R    | 5'-CGACCACAGATCGGCTTCCGGAGC-3'                 |
| A22-F    | 5'-AAGCTGTGGCGGTATAAAGTGCTG-3'                 |
| A22-R    | 5'-CACTTTATACGCCACAGCTTGGC-3'                  |

A23+24-F 5'-AAAGTGCTGGGCGACGATGGCAGCGGGTATGCGGATGAC-3'  
A23+24-R 5'-CCCGCTGCCATCGTCGCACAGCACTTTATACGACCACAG-3'  
A26-F 5'-GACATCGCCGAGGCGGATCCGCTAC-3'  
A26-R 5'-GCGGATCGCCTGGCGATGTCATC-3'  
A27+28-F 5'-GCGATCCGCACGCCGTGATCAGGGCGCCAGCAACGGG-3'  
A27+28-R 5'-GCCCTGATCACCGGCGTGCGGATCGCGTAGGCGATGTC-3'  
A29-F 5'-GCTGATCAGGCCACCGCCCTCAATACAAAAGTGGTGATTTCC-3'  
A29-R 5'-TGTATTGAGGGCGGTGGCCTGATCAGCGGCGTAGCG-3'  
A31-F 5'-GTGGTGATTAAATCATGTCGCTCGGC-3'  
A31-R 5'-GAGCGACATGTTAATCACCACCTTT-3'  
A32-F 5'-GGCGAGAGTTCGTTGATTTCCAATGCC-3'  
A32-R 5'-ACTCTCGCCGGAGGAGCCGAGCGACAT-3'  
A33-F 5'-TCGTTGATTACCAATGCCGTGACC-3'  
A33-R 5'-CACGGCATTGGTAAATCAACGAATC-3'  
A34-F 5'-AATGCCGTGACTATGCCCAACAG-3'  
A34-R 5'-TTGGGCATAGTCCACGGCATTGGA-3'  
A35~37-F 5'-TACGACAAAGGAGTGCTCATCATAGCGGCTGCCGGCAATTCC-3'  
A35~37-R 5'-TAGATGAGCACTCCTTTGTCTAGGCATAGGTCACGGCATT-3'  
A38-F 5'-AAGCCCGGTTTCGATCGGCTATCCGGGAGCG-3'  
A38-R 5'-CGAACCGGGCTTAGGGCCGGAATTGCCGGC-3'  
A39-F 5'-GGAGCGTTGTGACGCAGTAGCGGTC-3'  
A39-R 5'-CGCTACTGCGTTCACCAACGCTCCCGG-3'  
A41-F 5'-CTGGAATACAATTCAAACGGAACGTAC-3'  
A41-R 5'-TCCGTTTTGAATTTGATTTTCCAGAGCGGC-3'  
A43-F 5'-CACAAAGCGAACGGCCGGCGATTATGTG-3'  
A43-R 5'-TCGCTTGTGCCCCGGGAGGAGGAGTC-3'  
A44-F 5'-GTGATTCAGAGGGGACGTGGAAGTATCCGCG-3'  
A44-R 5'-TTCCACGTCCCCTCTCTGAATCACATAATCGCC-3'  
A46-F 5'-GACGTGGAAATATCCGCGCCAGGACGG-3'  
A46-R 5'-TGGCGCGGATAATTCCACGTCCCGCTC-3'  
A47-F 5'-GCGCCAGGAGCGGCGTCAATCGACGTGG-3'  
A47-R 5'-TTCGACCGCCGCTCCTGGCGCGGATACTTC-3'  
A48-F 5'-CGGGCGGTCTAATTCGACGTGGAACAACGGC-3'  
A48-R 5'-CCACGTCGATAAGACCGCCGTCCTGGCGC-3'  
A49-F 5'-TCGACGTGGTTCGACGGCGGGTACAATCCATCAGCGGC-3'  
A49-R 5'-GTACCCGCCGTCCGAAACACGTCGATTCGACCGCCCGTCC-3'  
A50-F 5'-GGCGGGTACGCTAACCATCAGCGGCACGTCCATGGCGACG-3'  
A50-R 5'-GCCGCTGATGGTAGCGTACCCGCCGTTGTTCCACGTCTGA-3'  
A51-F 5'-TCCATGGCGTCGCCGCATATCTCCGGG-3'  
A51-R 5'-GATATGCGGCGACGCCATGGACGTGCC-3'  
A52-F 5'-ACGCCGATGCCGCCGGGTTGGCAGCC-3'  
A52-R 5'-TGCCAACCCGGCGGCATGCGGCGTCGC-3'  
A53+54-F 5'-CAGTCTCCGGCAAGGAGCAATAACGATGTCCGTACCGAGCTGCAA-3'  
A53+54-R 5'-CGCTGCGGAGACTGTGCCAGATTTTGGCTGCCAACCCGGAGAT-3'

A55-F 5'-TGGAGCAAT<sup>G</sup>T<sup>T</sup>CGATGTCCGTACCGAG-3'  
A55-R 5'-ACGGACATCG<sup>A</sup>C<sup>T</sup>ATTGCTCCATGTCGG-3'  
A56-F 5'-GATGTCCGT<sup>G</sup>G<sup>T</sup>CGAGCTGCAAACCGC-3'  
A56-R 5'-TTGCAGCTCG<sup>C</sup>C<sup>T</sup>ACGGACATCGTTATT-3'  
A57-F 5'-GAGCTGCAAA<sup>C</sup>CCGCGGAAAGCG-3'  
A57-R 5'-TTTCGCGCGG<sup>G</sup>T<sup>T</sup>TTGCAGCTCGGT-3'  
A58-F 5'-AACCGCGCG<sup>T</sup>C<sup>T</sup>AG<sup>T</sup>TGAATGACATCCTGGGAGGCATC-3'  
A58-R 5'-GATGTCATT<sup>C</sup>A<sup>T</sup>C<sup>T</sup>G<sup>A</sup>CGCGCGGTTTTGCAGCTCGGT-3'  
A59+60-F 5'-GACATCCTG<sup>T</sup>C<sup>T</sup>AGGCA<sup>A</sup>CAGCGCTGCGGGAGGCGATGAT-3'  
A59+60-R 5'-CGCAGCGCTG<sup>T</sup>T<sup>T</sup>GCCT<sup>G</sup>A<sup>T</sup>CAGGATGTCATTCGCTTTCGC-3'  
A61-F 5'-ATCAGCGCTG<sup>G</sup>G<sup>T</sup>C<sup>T</sup>AGGCGATGATATCGCTTCCGGC-3'  
A61-R 5'-ATCATCGCCT<sup>G</sup>A<sup>T</sup>C<sup>T</sup>CAGCGCTGATGCCTCCCAGGAT-3'  
A63-F 5'-TTCGGATT<sup>C</sup>G<sup>T</sup>CGA<sup>A</sup>AGTCCAAGCGGGCGACCAAGTCGAC-3'  
A63-R 5'-CGCTTGGAC<sup>T</sup>T<sup>T</sup>TCG<sup>C</sup>GAATCCGAAGCCGGAAGCGATATC-3'  
A64-F 5'-TTCCCGACCGTCCAAC<sup>T</sup>CGAG<sup>C</sup>ACCACCACCACCACCAC-3'  
A64-R 5'-GTGGTGGTGGTGGTGGT<sup>G</sup>CTCAG<sup>T</sup>TTGGACGGTCGGGAA-3'  
B1+2-F 5'-<sup>C</sup>G<sup>T</sup><sup>G</sup>CTTCC<sup>C</sup>A<sup>A</sup>C<sup>A</sup>A<sup>A</sup>T<sup>C</sup>CCTTGGGGATCGAAGCGATTTATCGG-3'  
B1+2-R 5'-<sup>G</sup>A<sup>T</sup><sup>T</sup><sup>T</sup><sup>G</sup><sup>T</sup><sup>T</sup><sup>G</sup>GGAAG<sup>C</sup>A<sup>C</sup>G<sup>C</sup>CAATGCCTCGATGCGCCCCCTCCTCCTC-3'  
B4+5-F 5'-<sup>A</sup>A<sup>C</sup>AAT<sup>G</sup>A<sup>T</sup>A<sup>C</sup>G<sup>T</sup><sup>T</sup>A<sup>A</sup>CATCCACCAGCGGCGGCAAGGGGATT-3'  
B4+5-R 5'-<sup>T</sup>G<sup>T</sup><sup>T</sup>A<sup>A</sup>C<sup>G</sup>TATCATT<sup>G</sup>T<sup>T</sup>ATAAATCGCTTCGATCCCCCAAGG-3'  
B6-F 5'-CAATCCACCA<sup>C</sup>CGGCGGCAAGGGG-3'  
B6-R 5'-CTTGCCGCCG<sup>G</sup>TGGTGGATTGGAT-3'  
B7-F 5'-AGCGGCGG<sup>C</sup>T<sup>C</sup>GGGGATTCGCGTA-3'  
B7-R 5'-GCGAATCCCC<sup>G</sup>A<sup>T</sup>GCCGCCGCTGGT-3'  
B9+10-F 5'-<sup>G</sup>T<sup>C</sup>A<sup>A</sup>T<sup>T</sup>ACCT<sup>C</sup>GCATCCTGATCTGTCCGCAAT-3'  
B9+10-R 5'-<sup>C</sup>G<sup>A</sup>GGT<sup>A</sup>T<sup>T</sup>G<sup>A</sup>C<sup>G</sup>CCCGGTATCCAGGACGGCTAC-3'  
B11-F 5'-CCTGATCTG<sup>T</sup>C<sup>A</sup>A<sup>A</sup>CAATGTGGAGCAGTGC-3'  
B11-R 5'-CTCCACATTG<sup>T</sup>T<sup>T</sup>G<sup>A</sup>C<sup>C</sup>CAGATCAGGATGCGC-3'  
B13a -F 5'-AACTTCACC<sup>G</sup>GAG<sup>C</sup>T<sup>A</sup>C<sup>G</sup>A<sup>T</sup>CCTGTCGTGAACGGTTGCGCG-3'  
B13a -R 5'-CACGACAGGAG<sup>T</sup>C<sup>G</sup>T<sup>A</sup>G<sup>C</sup>TCC<sup>C</sup>GGTGAAGTTGTAGCACTGCTC-3'  
B13b'-F 5'-AGTTCGCCT<sup>A</sup>T<sup>C</sup>A<sup>A</sup>C<sup>A</sup>ACGGTTGCGCGGAC-3'  
B13b'-R 5'-GCAACCGTT<sup>G</sup>T<sup>T</sup>GAT<sup>T</sup>AGGCGAACTCGTGGT-3'  
B13b''-F 5'-GTCGTGAAC<sup>A</sup>GTTGCGCGGACGGC-3'  
B13b''-R 5'-GTCCGCGCAAC<sup>T</sup>GTTACGACAGG-3'  
B14-F 5'-AACGGTTGC<sup>A</sup>CGGACGGCAACGGA-3'  
B14-R 5'-GTTGCCGTCCG<sup>T</sup>GCAACCGTTCAC-3'  
B15-F 5'-TGCGCGGAC<sup>C</sup>GCAACGGACATGGG-3'  
B15-R 5'-ATGTCCGTTGC<sup>G</sup>GTCCGCGCAACC-3'  
B16-F 5'-GCCGGCACC<sup>G</sup>CCTCGCCAACGGA-3'  
B16-R 5'-GTTGGCGAGG<sup>G</sup>CGGTGCCGGCTAC-3'  
B17-F 5'-ATCCTCGCC<sup>G</sup>ACGGAGGAGGCGGC-3'  
B17-R 5'-GCCTCCTCCGT<sup>C</sup>GGCGAGGATGGT-3'  
B18-F 5'-<sup>A</sup>G<sup>C</sup>G<sup>A</sup>C<sup>C</sup>AAG<sup>C</sup>CGGGATTTGGGGCGTCGCTCCG-3'  
B18-R 5'-<sup>G</sup>G<sup>C</sup>T<sup>T</sup>G<sup>T</sup>CG<sup>C</sup>T<sup>T</sup>CCTCCGTTGGCGAGGATGGT-3'

B19-F 5'-AGCGGGATTTACGGCGTCGCTCCG-3'  
 B19-R 5'-AGCGACGCCGTAAATCCCGCTGCC-3'  
 B20-F 5'-GTCGCTCCGGA TGCCAAGCTGTGG-3'  
 B20-R 5'-CAGCTTGGCA TCCGGAGCGACGCC-3'  
 B23+24-F 5'-AAAGTGCTGTTAAGACAGTTGGCAGCGGGTATGCGGATGAC-3'  
 B23+24-R 5'-CCCGCTGCCACTTGTC TAA CAGCACTTTATACGACCACAG-3'  
 B25-F 5'-AGCGGGTATTCGGATGACATCGCC-3'  
 B25-R 5'-GATGTCATCCGA ATACCCGCTGCC-3'  
 B26-F 5'-GACATCGCCGCCGCGATCCGCTAC-3'  
 B26-R 5'-GCGGATCGCGGCCGCGATGTCATC-3'  
 B27-F 5'-GCGATCCGCCACGCCGCTGATCAG-3'  
 B27-R 5'-ATCAGCGGCGTGCGGATCGCGTA-3'  
 B29a -F 5'-GCCACCGCCCA CCGGGTAAAAGTGGTGATTTCATG-3'  
 B29a -R 5'-GCTGGCGGTGG CCTGATCAGCGGCGTAGCGGATCGC-3'  
 B29b+30-F 5'-ACAAAAACGATTTATTTCATGTCGCTCGGCTCCTCC-3'  
 B29b+30-R 5'-AATCGTTTTGTCCCGTTGCTGGCGCCCTGATCAGC-3'  
 B32-F 5'-GGCTCCTCCGCCAA TATTTCGTTGATTTCGAATGCCGTG-3'  
 B32-R 5'-AATCAACGAAT TATTGCGGAGGAGCCGAGCGACATGGA-3'  
 B33-F 5'-TTGATTTCCAGTGCCGTGACCTAT-3'  
 B33-R 5'-GGTCACGGCACTGGAAATCAACGA-3'  
 B34-F 5'-AATGCCGTGA ACTATGCCCAACAG-3'  
 B34-R 5'-TTGGGCATAGTTCACGGCATTGGA-3'  
 B35-F 5'-ACCTATGCC TATTTCGAAAGGAGCGCTCGTGGTAGCGGCT-3'  
 B35-R 5'-GAGCGTCCTTTCGAATAGGCATAGGTCACGGCATTGGA-3'  
 B36+37-F 5'-CAGCGAGGAGTGCTCATCTG TAGCGGCTGCCGGCAATTCC-3'  
 B36+37-R 5'-AGCCGCTACGATGAGCACTCCTCGCTGTTGGGCATAGGT-3'  
 B38-F 5'-AATCCGGCTATTTCGAGGGTACGATCGGCTATCCGGGAGCGTTG-3'  
 B38-R 5'-GCCGATCGTACCCTGCGAA TACCGGAATTGCCGGCAGCCGCTAC-3'  
 B39+40-F 5'-CCGACGCAATTTGCGGTCCGCTCTGGAAAATATA-3'  
 B39+40-R 5'-AATGCGTTCGGCAACGCTCCCGGATAGCCGATCGT-3'  
 B41-F 5'-CTGGAATAATGTACAGAAAACGGA-3'  
 B41-R 5'-GTTTTGCTGTACATTTTCCAGAGC-3'  
 B42-F 5'-GTGGCTGACTACTCCTCCCGGGG-3'  
 B42-R 5'-CCGGGAGGAGTAGTCAGCCACACG-3'  
 B43-F 5'-TCCCGGGGGTACATCTCAACGGCCGGCGATTATGTG-3'  
 B43-R 5'-GCCGGCCGTTGAGATGTACCCCGGGAGGAGGAGTC-3'  
 B44~46-F 5'-GGGACATCGAAATTTCCGCGCCAGGACGGGCGGTCGAA-3'  
 B44~46-R 5'-AATTTCCGATGTCCCCTCCTGAATCACATAATCGCCGGC-3'  
 B47+48-F 5'-TCGTGGTCTATTTCGACGTGGAACAACGGCGGGTAC-3'  
 B47+48-R 5'-ATAGACCGACGATCCTGGCGCGGATACTTCCACGTC-3'  
 B49-F 5'-TCGACGTGGTACAACGGCGGGTAC-3'  
 B49-R 5'-CCCGCCGTTGTACCACGTCGATTC-3'  
 B50-F 5'-GGGTACAATACCATCAGCGGCACG-3'  
 B50-R 5'-GCCGCTGATGGTATTGTACCCGCC-3'

B52-F 5'-ACGCCGCATGTCTCCGGGTTGGCA-3'  
 B52-R 5'-CAACCCGGAGACCATGCGGCGTCGC-3'  
 B53+54-F 5'-GAGAATCCGTCATTGAGCAATAACGATGTCCGTACCGAG-3'  
 B53+54-R 5'-CAATGACGGATTCTTGCCCAGATTTTGGC  
 B55-F 5'-TGGAGCAATACCCAACTCCGTACCGAGCTGCAAAACCGC-3'  
 B55-R 5'-CTCGGTACGGAGTTGGTATTGCTCCATGTCGGATGCGA-3'  
 B56-F 5'-GATGTCCGTTCCAACTGCAAAACCGCGCG-3'  
 B56-R 5'-GTTTTGCAGGTTGGAACGGACATCGTTATT-3'  
 B57-F 5'-GAGCTGCAAGAGCGCGCGAAAGCG-3'  
 B57-R 5'-TTTCGCGCGCTCTTGCAGCTCGGT-3'  
 B58-F 5'-CGCGCGAAATCGTTGACATCCTGGGAGGC-3'  
 B58-R 5'-CAGGATGTCAACGATTTCGCGCGGTTTTG-3'  
 B59-F 5'-AATGACATCAAGGGAGGCATCAGC-3'  
 B59-R 5'-GATGCCTCCCTTGATGTCATTTCG-3'  
 B60-F 5'-CTGGGAGGCTACGGCGCTGCGGGAGGCGAT-3'  
 B60-R 5'-TCCCGCAGCGCCGTAGCCTCCCAGGATGTC-3'  
 B61-F 5'-AGCGCTGCGATTGGCGATGATATC-3'  
 B61-R 5'-ATCATCGCCAATCGCAGCGCTGAT-3'  
 B62-F 5'-GGCGATGATTACGCTTCCGGCTTC-3'  
 B62-R 5'-GCCGGAAGCGTAATCATCGCCTCC-3'  
 B63-F 5'-TTCGGATTCGCGCGTCCAAGCGGGCGAC-3'  
 B63-R 5'-CGCTTGACGCGCGAATCCGAAGCCGGA-3'

---

\* Underlined sequences indicate the restriction enzyme sites used in this study. Boxes indicate the mutated nucleotides. Italicized sections indicate the His<sub>6</sub>-tag-encoding DNA sequences.

**TABLE S2 Primer pairs, template, PCR methods and restriction enzyme sites used in plasmid construction.**

| Plasmid  | Primer pair                                      | Template    | Method      | Restriction site            |
|----------|--------------------------------------------------|-------------|-------------|-----------------------------|
| pWT      | PB-F/PX-R                                        | Genomic DNA |             | <i>Bam</i> HI/ <i>Xho</i> I |
| pWA1     | PB-F/A1-R (5'-end)<br>A1-F/PX-R (3'-end)         | pWT         | Overlap     | <i>Bam</i> HI/ <i>Xho</i> I |
| pWA2     | A2-F/A2-R                                        | pWT         | Quickchange | –                           |
| pWA3     | A3-F/A3-R                                        | pWT         | Quickchange | –                           |
| pWA4     | A4-F/A4-R                                        | pWT         | Quickchange | –                           |
| pWA5     | PB-F/A5-R (5'-end)<br>A5-F/PX-R (3'-end)         | pWT         | Overlap     | <i>Bam</i> HI/ <i>Xho</i> I |
| pWA7     | PB-F/A7-R (5'-end)<br>A7-F/PX-R (3'-end)         | pWT         | Overlap     | <i>Bam</i> HI/ <i>Xho</i> I |
| pWA8     | A8-F/A8-R                                        | pWT         | Quickchange | –                           |
| pWA9     | PB-F/A9-R (5'-end)<br>A9-F/PX-R (3'-end)         | pWT         | Overlap     | <i>Bam</i> HI/ <i>Xho</i> I |
| pWA10    | A10-F/A10-R                                      | pWT         | Quickchange | –                           |
| pWA11    | A11-F/A11-R                                      | pWT         | Quickchange | –                           |
| pWA12    | A12-F/A12-R                                      | pWT         | Quickchange | –                           |
| pWA13a   | PB-F/A13a-R (5'-end)<br>A13a-F/PX-R (3'-end)     | pWT         | Overlap     | <i>Bam</i> HI/ <i>Xho</i> I |
| pWA13b   | PB-F/A13b-R (5'-end)<br>A13b-F/PX-R (3'-end)     | pWT         | Overlap     | <i>Bam</i> HI/ <i>Xho</i> I |
| pWA14+15 | PB-F/A14+15-R (5'-end)<br>A14+15-F/PX-R (3'-end) | pWT         | Overlap     | <i>Bam</i> HI/ <i>Xho</i> I |
| pWA16    | PB-F/A16-R (5'-end)<br>A16-F/PX-R (3'-end)       | pWT         | Overlap     | <i>Bam</i> HI/ <i>Xho</i> I |
| pWA18    | A18-F/A18-R                                      | pWT         | Quickchange | –                           |
| pWA19    | A19-F/A19-R                                      | pWT         | Quickchange | –                           |
| pWA21    | A21-F/A21-R                                      | pWT         | Quickchange | –                           |
| pWA22    | A22-F/A22-R                                      | pWT         | Quickchange | –                           |
| pWA23+24 | PB-F/A23+24-R (5'-end)<br>A23+24-F/PX-R (3'-end) | pWT         | Overlap     | <i>Bam</i> HI/ <i>Xho</i> I |
| pWA26    | A26-F/A26-R                                      | pWT         | Quickchange | –                           |
| pWA27+28 | PB-F/A27+28-R (5'-end)<br>A27+28-F/PX-R (3'-end) | pWT         | Overlap     | <i>Bam</i> HI/ <i>Xho</i> I |
| pWA29    | PB-F/A29-R (5'-end)<br>A29-F/PX-R (3'-end)       | pWT         | Overlap     | <i>Bam</i> HI/ <i>Xho</i> I |
| pWA31    | A31-F/A31-R                                      | pWT         | Quickchange | –                           |
| pWA32    | PB-F/A32-R (5'-end)<br>A32-F/PX-R (3'-end)       | pWT         | Overlap     | <i>Bam</i> HI/ <i>Xho</i> I |
| pWA33    | A33-F/A33-R                                      | pWT         | Quickchange | –                           |
| pWA34    | PB-F/A34-R (5'-end)<br>A34-F/PX-R (3'-end)       | pWT         | Overlap     | <i>Bam</i> HI/ <i>Xho</i> I |

|          |                                                  |     |             |                             |
|----------|--------------------------------------------------|-----|-------------|-----------------------------|
| pWA35~37 | PB-F/A35~37-R (5'-end)<br>A35~37-F/PX-R (3'-end) | pWT | Overlap     | <i>Bam</i> HI/ <i>Xho</i> I |
| pWA38    | PB-F/A38-R (5'-end)<br>A38-F/PX-R (3'-end)       | pWT | Overlap     | <i>Bam</i> HI/ <i>Xho</i> I |
| pWA39    | A39-F/A39-R                                      | pWT | Quickchange | –                           |
| pWA41    | A41-F/A41-R                                      | pWT | Quickchange | –                           |
| pWA43    | PB-F/A43-R (5'-end)<br>A43-F/PX-R (3'-end)       | pWT | Overlap     | <i>Bam</i> HI/ <i>Xho</i> I |
| pWA44    | A44-F/A44-R                                      | pWT | Quickchange | –                           |
| pWA46    | A46-F/A46-R                                      | pWT | Quickchange | –                           |
| pWA47    | A47-F/A47-R                                      | pWT | Quickchange | –                           |
| pWA48    | A48-F/A48-R                                      | pWT | Quickchange | –                           |
| pWA49    | PB-F/A49-R (5'-end)<br>A49-F/PX-R (3'-end)       | pWT | Overlap     | <i>Bam</i> HI/ <i>Xho</i> I |
| pWA50    | PB-F/A50-R (5'-end)<br>A50-F/PX-R (3'-end)       | pWT | Overlap     | <i>Bam</i> HI/ <i>Xho</i> I |
| pWA51    | A51-F/A51-R                                      | pWT | Quickchange | –                           |
| pWA52    | A52-F/A52-R                                      | pWT | Quickchange | –                           |
| pWA53+54 | PB-F/A53+54-R (5'-end)<br>A53+54-F/PX-R (3'-end) | pWT | Overlap     | <i>Bam</i> HI/ <i>Xho</i> I |
| pWA55    | A55-F/A55-R                                      | pWT | Quickchange | –                           |
| pWA56    | A56-F/A56-R                                      | pWT | Quickchange | –                           |
| pWA57    | A57-F/A57-R                                      | pWT | Quickchange | –                           |
| pWA58    | A58-F/A58-R                                      | pWT | Quickchange | –                           |
| pWA59+60 | A59+60-F/A59+60-R                                | pWT | Quickchange | –                           |
| pWA61    | A61-F/A61-R                                      | pWT | Quickchange | –                           |
| pWA63    | A63-F/A63-R                                      | pWT | Quickchange | –                           |
| pWA64    | A64-F/A64-R                                      | pWT | Quickchange | –                           |
| pWB1+2   | PB-F/B1+2-R (5'-end)<br>B1+2-F/PX-R (3'-end)     | pWT | Overlap     | <i>Bam</i> HI/ <i>Xho</i> I |
| pWB4+5   | PB-F/B4+5-R (5'-end)<br>B4+5-F/PX-R (3'-end)     | pWT | Overlap     | <i>Bam</i> HI/ <i>Xho</i> I |
| pWB6     | B6-F/B6-R                                        | pWT | Quickchange | –                           |
| pWB7     | B7-F/B7-R                                        | pWT | Quickchange | –                           |
| pWB9+10  | PB-F/B9+10-R (5'-end)<br>B9+10-F/PX-R (3'-end)   | pWT | Overlap     | <i>Bam</i> HI/ <i>Xho</i> I |
| pWB11    | B11-F/B11-R                                      | pWT | Quickchange | –                           |
| pWB13a   | B13a-F/B13a-R                                    | pWT | Quickchange | –                           |
| pWB13b'  | B13b'-F/B13b'-R                                  | pWT | Quickchange | –                           |
| pWB13b'' | B13b''-F/B13b''-R                                | pWT | Quickchange | –                           |
| pWB14    | B14-F/B14-R                                      | pWT | Quickchange | –                           |
| pWB15    | B15-F/B15-R                                      | pWT | Quickchange | –                           |
| pWB16    | B16-F/B16-R                                      | pWT | Quickchange | –                           |
| pWB17    | B17-F/B17-R                                      | pWT | Quickchange | –                           |



|           |                                                    |     |             |                    |
|-----------|----------------------------------------------------|-----|-------------|--------------------|
| pWB18     | PB-F/B18-R (5'-end)<br>B18-F/PX-R (3'-end)         | pWT | Overlap     | <i>BamHI/Xho I</i> |
| pWB19     | B19-F/B19-R                                        | pWT | Quickchange | –                  |
| pWB20     | B20-F/B20-R                                        | pWT | Quickchange | –                  |
| pWB23+24  | PB-F/B23+24-R (5'-end)<br>B23+24-F/PX-R (3'-end)   | pWT | Overlap     | <i>BamHI/Xho I</i> |
| pWB25     | B25-F/B25-R                                        | pWT | Quickchange | –                  |
| pWB26     | B26-F/B26-R                                        | pWT | Quickchange | –                  |
| pWB27     | B27-F/B27-R                                        | pWT | Quickchange | –                  |
| pWB29a    | PB-F/B29a-R (5'-end)<br>B29a-F/PX-R (3'-end)       | pWT | Overlap     | <i>BamHI/Xho I</i> |
| pWB29b+30 | PB-F/B29b+30-R (5'-end)<br>B29b+30-F/PX-R (3'-end) | pWT | Overlap     | <i>BamHI/Xho I</i> |
| pWB32     | B32-F/B32-R                                        | pWT | Quickchange | –                  |
| pWB33     | B33-F/B33-R                                        | pWT | Quickchange | –                  |
| pWB34     | B34-F/B34-R                                        | pWT | Quickchange | –                  |
| pWB35     | B35-F/B35-R                                        | pWT | Quickchange | –                  |
| pWB36+37  | PB-F/B36+37-R (5'-end)<br>B36+37-F/PX-R (3'-end)   | pWT | Overlap     | <i>BamHI/Xho I</i> |
| pWB38     | PB-F/B38-R (5'-end)<br>B38-F/PX-R (3'-end)         | pWT | Overlap     | <i>BamHI/Xho I</i> |
| pWB39+40  | PB-F/B39+40-R (5'-end)<br>B39+40-F/PX-R (3'-end)   | pWT | Overlap     | <i>BamHI/Xho I</i> |
| pWB41     | B41-F/B41-R                                        | pWT | Quickchange | –                  |
| pWB42     | B42-F/B42-R                                        | pWT | Quickchange | –                  |
| pWB43     | PB-F/B43-R (5'-end)<br>B43-F/PX-R (3'-end)         | pWT | Overlap     | <i>BamHI/Xho I</i> |
| pWB47+48  | PB-F/B47+48-R (5'-end)<br>B47+48-F/PX-R (3'-end)   | pWT | Overlap     | <i>BamHI/Xho I</i> |
| pWB49     | B49-F/B49-R                                        | pWT | Quickchange | –                  |
| pWB50     | B50-F/B50-R                                        | pWT | Quickchange | –                  |
| pWB52     | B52-F/B52-R                                        | pWT | Quickchange | –                  |
| pWB53+54  | PB-F/B53+54-R (5'-end)<br>B53+54-F/PX-R (3'-end)   | pWT | Overlap     | <i>BamHI/Xho I</i> |
| pWB55     | B55-F/B55-R                                        | pWT | Quickchange | –                  |
| pWB56     | B56-F/B56-R                                        | pWT | Quickchange | –                  |
| pWB57     | B57-F/B57-R                                        | pWT | Quickchange | –                  |
| pWB58     | B58-F/B58-R                                        | pWT | Quickchange | –                  |
| pWB59     | B59-F/B59-R                                        | pWT | Quickchange | –                  |
| pWB60     | PB-F/B60-R (5'-end)<br>B60-F/PX-R (3'-end)         | pWT | Overlap     | <i>BamHI/Xho I</i> |
| pWB61     | B61-F/B61-R                                        | pWT | Quickchange | –                  |
| pWB62     | B62-F/B62-R                                        | pWT | Quickchange | –                  |
| pWB63     | PB-F/B63-R (5'-end)                                | pWT | Overlap     | <i>BamHI/Xho I</i> |

|             |                                                           |          |                          |                    |
|-------------|-----------------------------------------------------------|----------|--------------------------|--------------------|
|             | B63-F/PX-R (3'-end)                                       |          |                          |                    |
| pWA23+24+31 | A31-F/A31-R                                               | pWA23+24 | Quickchange              | –                  |
| pWA31+47    | A31-F/A31-R                                               | pWA47    | Quickchange              | –                  |
| pWA23+24+47 | A47-F/A47-R                                               | pWA23+24 | Quickchange              | –                  |
| pWA47+WB16  | B16-F/B16-R                                               | pWA47    | Quickchange              | –                  |
| pWA31+WB16  | B16-F/B16-R                                               | pWA31    | Quickchange              | –                  |
| pWA31+WB50  | B50-F/B50-R                                               | pWA31    | Quickchange              | –                  |
| pSatb       | B50-F/B50-R                                               | pWA31+47 | Quickchange              | –                  |
| pSatg       | PB-F/A23+24-R (5'-end)<br>A23+24-F/PX-R (3'-end)          | pSatb    | Overlap                  | <i>BamHI/Xho I</i> |
| pSatf       | B16-F/B16-R                                               | pSatb    | Quickchange              | –                  |
| pSath       | PB-F/A23+24-R (5'-end)<br>A23+24-F/PX-R (3'-end)          | pSatf    | Overlap                  | <i>BamHI/Xho I</i> |
| pWA31+49    | A31-F/A31-R                                               | pWA49    | Quickchange              | –                  |
| pWA22+56    | A22-F/A22-R                                               | pWA56    | Quickchange              | –                  |
| pWA22+58    | A22-F/A22-R                                               | pWA58    | Quickchange              | –                  |
| pWA31+56    | A31-F/A31-R                                               | pWA56    | Quickchange              | –                  |
| pWA31+58    | A31-F/A31-R                                               | pWA58    | Quickchange              | –                  |
| pWA49+56    | A56-F/A56-R                                               | pWA49    | Quickchange              | –                  |
| pWA49+58    | A58-F/A58-R                                               | pWA49    | Quickchange              | –                  |
| pWA56+58    | A58-F/A58-R                                               | pWA56    | Quickchange              | –                  |
| pWA22+31    | A22-F/A22-R                                               | pWA31    | Quickchange              | –                  |
| pWA22+49    | A22-F/A22-R                                               | pWA49    | Quickchange              | –                  |
| pWA22+31+49 | A31-F/A31-R                                               | pWA22+49 | Quickchange              | –                  |
|             | PB-F/A22-R (5'-end)<br>A22-F/PX-R (3'-end)                |          |                          |                    |
| pPBL5X      | PB-F/A49-R (5'-end)<br>A49-F/PX-R (3'-end)<br>A56-F/A56-R | pSatf    | Overlap +<br>Quickchange | <i>BamHI/Xho I</i> |
| pPBL5X+WA58 | A58-F/A58-R                                               | pPBL5X   | Quickchange              | –                  |
| pS/A        | SA-F/SA-R                                                 | pWT      | Quickchange              | –                  |
| pP-S/A      | SA-F/SA-R                                                 | pPBL5X   | Quickchange              | –                  |

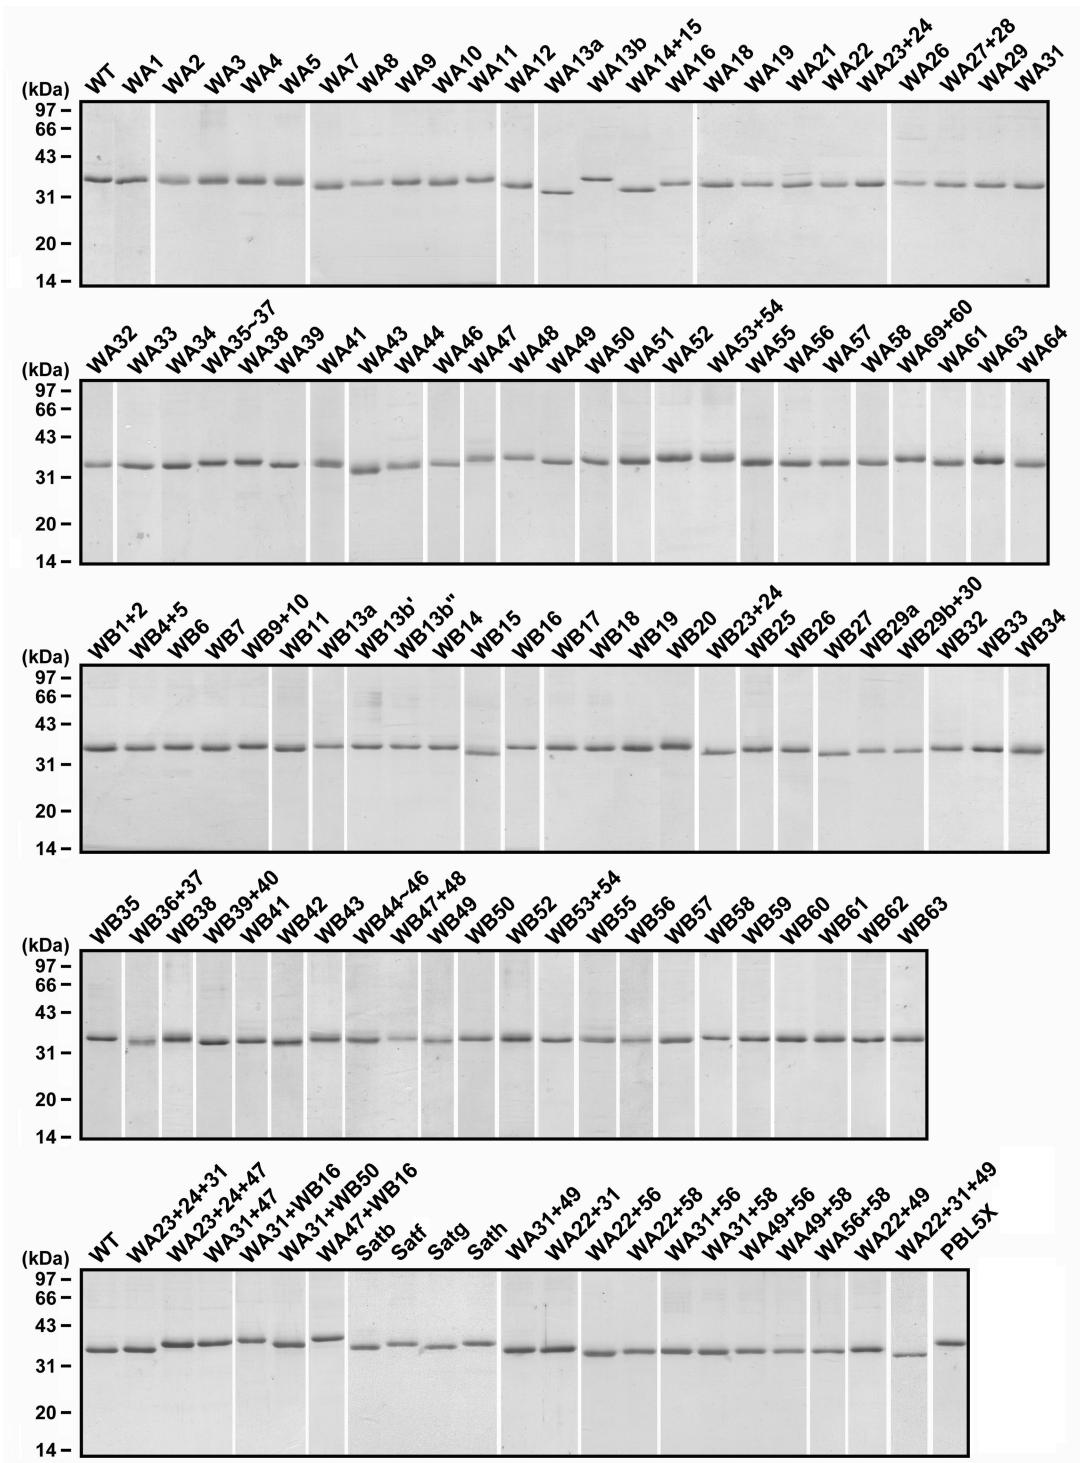

**Figure S1. SDS-PAGE analysis of the purified samples of the mature enzymes.** The mature forms of wild-type WF146 protease (WT) and its variants were purified and subjected to SDS-PAGE analysis as described under “Materials and Methods”.
